# Supplementary material for: Production of Enriched Biomass by Carotenogenic Yeasts Cultivated on by-Products of Poultry Processing—A Screening Study
Source: MDPI journal article supplement (doi:10.3390/microorganisms11020321), 2023-01-27
Supplement: s1 [file s1]

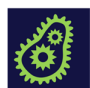

## Contents:

|                  |                                                                                                                                                                  |
|------------------|------------------------------------------------------------------------------------------------------------------------------------------------------------------|
| <b>Table S1.</b> | Fatty acids content of poultry waste fat                                                                                                                         |
| <b>Table S2</b>  | Results from analysis of biomass from first inoculum of yeast strain <i>Rhodospiridium toruloides</i>                                                            |
| <b>Table S3.</b> | Results of cultivation of <i>Rhodotorula kratochvilovae</i> (1A) and <i>Cystofilobasidium macerans</i> (1B)                                                      |
| <b>Table S4.</b> | Results of cultivation of two different strains of <i>Rhodotorula mucilaginosa</i> : strain CCY 19-4-25 (2A) and strain CCY 20-9-7 (2B)                          |
| <b>Table S5.</b> | Results of cultivation of two different species of the <i>Sporidiobolus</i> genus: <i>Sporidiobolus metaroseus</i> (3A) and <i>Sporidiobolus pararoseus</i> (3B) |

Table S1. Fatty acids content of poultry waste fat

| SFA [%] |             | MUFA [%] |             | PUFA [%] |             |
|---------|-------------|----------|-------------|----------|-------------|
| C4:0    | 0,48±0,011  | C14:1    | 0,36±0,012  | C18:2c   | 19,38±0,739 |
| C14:0   | 1,30±0,020  | C16:1    | 5,39±0,133  | C18:3d6  | 0,40±0,009  |
| C16:0   | 22,44±0,708 | C18:1c   | 40,69±0,902 | C18:3d3  | 2,27±0,080  |
| C18:0   | 5,77±0,124  | C20:1    | 0,63±0,011  |          |             |
| C22:0   | 0,88±0,013  |          |             |          |             |
| SFA     | 30,87±0,877 | MUFA     | 47,07±1,058 | PUFA     | 22,06±0,828 |

Table S2. Results of biomass from first inoculum of yeast strain *Rhodospiridium toruloides*

|                            |             |
|----------------------------|-------------|
| Inoculation media analysis |             |
| Biomass [g]                | 9,12±1,86   |
| Total carotenoids [mg/g]   | 1,548±0,365 |
| Ergosterol [mg/g]          | 4,862±1,203 |
| Ubiquinone [mg/g]          | 3,152±0,447 |
| Lipids [%]                 | 16,87±4,38  |
| SFA [%]                    | 39,59±2,58  |
| MUFA [%]                   | 56,22±4,12  |
| PUFA [%]                   | 4,19±0,47   |

Table S3. Results of cultivation of *Rhodotorula kratochvilovae* (1A) and *Cystofilobasidium macerans* (1B)

|                                       | Medium          | C/N25                    |                   |                   |               |                   | C/N 50                   |                   |                   |               |                   |
|---------------------------------------|-----------------|--------------------------|-------------------|-------------------|---------------|-------------------|--------------------------|-------------------|-------------------|---------------|-------------------|
|                                       |                 | Total carotenoids [mg/g] | Ubiquinone [mg/g] | Ergosterol [mg/g] | biomass [g/l] | lipid content [%] | Total carotenoids [mg/g] | Ubiquinone [mg/g] | Ergosterol [mg/g] | biomass [g/l] | lipid content [%] |
| 1A: <i>Rhodotorula kratochvilovae</i> | GLY             | 1,602±0,135              | 10,495±0,778      | 3,443±0,281       | 8,1±1,15      | 10,31±1,34        | 1,197±0,089              | 5,702±0,368       | 3,705±0,228       | 11,6±1,20     | 17,43±1,47        |
|                                       | FAT             | 0,243±0,008              | 5,669±0,462       | 0,796±0,049       | 5,3±0,80      | 46,79±3,81        | 0,382±0,031              | 3,959±0,283       | 1,481±0,109       | 18,7±1,75     | 23,14±2,23        |
|                                       | F+10 % GLY      | 0,558±0,037              | 5,161±0,231       | 2,025±0,105       | 17,7±2,25     | 31,56±2,04        | 0,430±0,026              | 4,749±0,238       | 1,628±0,087       | 18,6±1,20     | 23,90±2,01        |
|                                       | F+25 % GLY      | 0,338±0,017              | 4,559±0,326       | 1,163±0,073       | 19,2±1,45     | 37,28±3,41        | 0,579±0,041              | 4,742±0,150       | 1,891±0,154       | 21,2±2,00     | 23,68±2,50        |
|                                       | GLY+F.H.        | 1,435±0,088              | 3,672±0,188       | 3,778±0,240       | 3,1±0,95      | 20,55±1,68        | 0,811±0,042              | 4,211±0,342       | 3,294±0,134       | 12,7±0,60     | 17,80±2,22        |
|                                       | GLY (F.H.)      | 0,287±0,027              | 5,011±0,225       | 3,416±0,279       | 13,7±0,35     | 24,24±2,28        | 1,324±0,052              | 13,149±0,852      | 5,442±0,398       | 17,0±0,90     | 14,23±0,92        |
|                                       | FAT+F.H.        | 0,166±0,014              | 2,960±0,145       | 1,373±0,080       | 14,1±1,15     | 23,98±1,31        | 0,506±0,026              | 4,831±0,358       | 5,634±0,254       | 11,5±1,90     | 26,59±2,17        |
|                                       | F+10 % GLY+F.H. | 0,331±0,021              | 4,843±0,297       | 2,383±0,170       | 13,9±1,80     | 23,25±2,36        | 0,511±0,021              | 8,306±0,466       | 11,584±0,713      | 16,7±1,40     | 15,45±1,41        |
|                                       | F+25 % GLY+F.H. | 0,313±0,019              | 6,238±0,288       | 2,455±0,199       | 15,3±0,95     | 24,20±3,19        | 0,572±0,047              | 8,332±0,595       | 4,937±0,255       | 21,5±1,75     | 37,87±2,65        |
|                                       | GLY+F.H. (F.H.) | 0,427±0,035              | 5,342±0,381       | 2,958±0,153       | 12,2±1,50     | 15,18±1,69        | 0,486±0,031              | 15,505±1,238      | 5,057±0,366       | 15,5±1,50     | 17,77±1,51        |
| 1B: <i>Cystofilobasidium macerans</i> | GLY             | 1,963±0,127              | 10,939±0,827      | 2,707±0,225       | 8,1±1,20      | 16,20±2,02        | 1,950±0,106              | 4,701±0,232       | 2,992±0,109       | 15,5±1,20     | 13,38±1,65        |
|                                       | FAT             | 0,775±0,060              | 3,905±0,174       | 2,209±0,087       | 7,3±0,85      | 18,62±2,51        | 4,056±0,277              | 6,123±0,430       | 4,544±0,258       | 3,1±0,55      | 17,45±1,91        |
|                                       | F+10 % GLY      | 0,360±0,023              | 4,205±0,272       | 2,315±0,153       | 9,1±0,80      | 24,18±2,77        | 4,916±0,367              | 5,819±0,311       | 4,746±0,300       | 9,7±1,00      | 16,40±1,89        |
|                                       | F+25 % GLY      | 0,374±0,030              | 3,466±0,178       | 2,358±0,111       | 12,1±0,95     | 29,73±2,82        | 1,881±0,153              | 5,107±0,253       | 2,880±0,151       | 13,5±1,50     | 20,97±2,26        |
|                                       | GLY+F.H.        | 1,325±0,100              | 4,104±0,329       | 3,383±0,234       | 14,6±1,15     | 12,58±1,32        | 1,726±0,111              | 7,815±0,480       | 3,737±0,153       | 14,2±0,90     | 14,85±1,85        |
|                                       | GLY (F.H.)      | 0,977±0,055              | 7,405±0,528       | 3,721±0,237       | 10,1±0,75     | 12,69±1,20        | 0,593±0,041              | 8,228±0,578       | 3,602±0,125       | 21,3±1,10     | 22,62±1,92        |
|                                       | FAT+F.H.        | 0,273±0,017              | 4,060±0,181       | 9,932±0,553       | 12,6±1,35     | 31,88±2,71        | 0,135±0,009              | 4,202±0,321       | 2,516±0,171       | 5,7±0,85      | 26,46±2,20        |
|                                       | F+10 % GLY+F.H. | 0,330±0,024              | 3,142±0,196       | 5,455±0,385       | 14,3±1,00     | 27,18±3,49        | 0,532±0,045              | 6,490±0,470       | 8,728±0,702       | 14,0±1,05     | 20,59±1,54        |
|                                       | F+25 % GLY+F.H. | 0,554±0,045              | 7,951±0,431       | 6,587±0,379       | 15,1±1,20     | 25,06±2,73        | 0,432±0,027              | 7,630±0,660       | 6,456±0,383       | 14,3±0,95     | 23,92±2,25        |
|                                       | GLY+F.H. (F.H.) | 0,334±0,014              | 6,118±0,376       | 3,826±0,244       | 16,6±1,10     | 20,54±1,19        | 0,371±0,016              | 9,864±0,363       | 3,142±0,198       | 17,5±1,05     | 18,95±1,98        |

Table S4. Results of cultivation of two different strains of *Rhodotorula mucilaginosa*: strain CCY 19-4-25 (2A) and strain CCY 20-9-7 (2B)

4

|                                                   | medium          | C/N25                    |                   |                   |               |                   | C/N 50                   |                   |                   |               |                   |
|---------------------------------------------------|-----------------|--------------------------|-------------------|-------------------|---------------|-------------------|--------------------------|-------------------|-------------------|---------------|-------------------|
|                                                   |                 | Total carotenoids [mg/g] | Ubiquinone [mg/g] | Ergosterol [mg/g] | biomass [g/l] | lipid content [%] | Total carotenoids [mg/g] | Ubiquinone [mg/g] | Ergosterol [mg/g] | biomass [g/l] | lipid content [%] |
| 2A: <i>Rhodotorula mucilaginosa</i> (CCY 19-4-25) | GLY             | 10,469±0,477             | 5,726±0,261       | 6,833±0,250       | 14,7±0,65     | 11,44±0,69        | 3,314±0,151              | 3,714±0,169       | 4,594±0,207       | 6,9±0,65      | 21,18±1,79        |
|                                                   | FAT             | 3,249±0,210              | 5,144±0,198       | 3,616±0,204       | 29,5±1,80     | 25,48±2,37        | 0,617±0,042              | 4,228±0,062       | 2,749±0,141       | 2,0±0,80      | 13,17±1,38        |
|                                                   | F+10 % GLY      | 6,583±0,629              | 4,539±0,207       | 4,377±0,327       | 24,8±0,75     | 17,67±0,96        | 1,450±0,024              | 2,271±0,104       | 1,798±0,136       | 10,1±0,90     | 31,84±3,66        |
|                                                   | F+25 % GLY      | 7,430±0,211              | 5,186±0,296       | 5,121±0,234       | 21,7±1,00     | 20,39±1,66        | 3,062±0,107              | 4,009±0,259       | 3,844±0,236       | 12,8±1,65     | 16,97±1,44        |
|                                                   | GLY+F.H.        | 2,923±0,133              | 4,216±0,176       | 3,873±0,212       | 9,5±0,85      | 11,97±1,56        | 0,134±0,006              | 3,493±0,147       | 3,930±0,179       | 8,7±0,75      | 10,59±0,99        |
|                                                   | GLY (F.H.)      | 1,044±0,067              | 2,225±1,511       | 3,059±0,140       | 18,2±2,05     | 8,95±0,86         | 6,044±0,281              | 4,067±0,108       | 6,118±0,375       | 15,2±1,10     | 11,76±0,76        |
|                                                   | FAT+F.H.        | 2,322±0,034              | 8,932±1,782       | 2,500±0,163       | 16,7±0,70     | 19,97±2,53        | 4,438±0,305              | 7,838±0,358       | 3,976±0,155       | 28,3±0,95     | 30,35±2,57        |
|                                                   | F+10 %          |                          |                   |                   |               |                   |                          |                   |                   |               |                   |
|                                                   | GLY+F.H.        | 1,491±0,052              | 4,848±0,145       | 2,476±1,386       | 16,3±1,05     | 23,34±2,10        | 4,635±0,345              | 6,317±0,099       | 3,535±0,164       | 27,7±1,15     | 38,33±3,75        |
|                                                   | F+25 %          |                          |                   |                   |               |                   |                          |                   |                   |               |                   |
|                                                   | GLY+F.H.        | 0,495±0,027              | 2,905±0,149       | 2,016±0,152       | 17,0±1,15     | 24,71±2,10        | 5,613±0,194              | 7,573±0,345       | 4,442±0,243       | 28,3±1,35     | 35,67±1,95        |
|                                                   | GLY+F.H. (F.H.) | 4,776±0,261              | 3,615±0,259       | 3,218±0,156       | 19,1±1,55     | 15,73±1,08        | 5,187±0,285              | 5,209±0,336       | 4,621±0,137       | 19,7±1,30     | 14,29±1,21        |
| 2B: <i>Rhodotorula mucilaginosa</i> (CCY 20-9-7)  | GLY             | 2,241±0,138              | 2,129±0,137       | 3,237±0,102       | 3,2±0,70      | 10,31±0,87        | 1,187±0,072              | 1,792±0,099       | 2,472±0,153       | 5,9±0,80      | 6,81±0,96         |
|                                                   | FAT             | 0,458±0,037              | 1,561±0,116       | 0,695±0,031       | 7,1±0,90      | 46,79±6,16        | 1,081±0,081              | 5,763±0,354       | 2,402±0,076       | 8,5±1,05      | 30,20±4,57        |
|                                                   | F+10 % GLY      | 1,324±0,079              | 3,379±0,106       | 2,152±0,110       | 6,8±1,05      | 31,56±3,63        | 1,221±0,103              | 6,084±0,272       | 2,195±0,141       | 8,3±1,05      | 28,34±3,25        |
|                                                   | F+25 % GLY      | 1,078±0,080              | 3,894±0,250       | 2,334±0,096       | 6,0±0,60      | 37,28±2,90        | 1,100±0,071              | 5,371±0,447       | 2,147±0,154       | 8,7±1,50      | 32,85±2,78        |
|                                                   | GLY+F.H.        | 1,297±0,058              | 3,574±0,184       | 3,649±0,296       | 11,2±1,00     | 20,55±1,33        | 0,928±0,048              | 4,772±0,451       | 3,328±0,148       | 6,6±1,05      | 6,76±0,64         |
|                                                   | GLY (F.H.)      | 0,243±0,015              | 3,662±0,272       | 4,945±0,303       | 17,8±0,85     | 24,24±2,53        | 0,196±0,014              | 1,572±0,050       | 3,441±0,227       | 16,8±1,20     | 12,67±1,07        |
|                                                   | FAT+F.H.        | 0,209±0,009              | 5,418±0,239       | 4,153±0,254       | 15,1±1,10     | 23,98±2,67        | 0,407±0,021              | 7,894±0,410       | 3,895±0,274       | 26,1±1,20     | 28,06±1,72        |
|                                                   | F+10 %          |                          |                   |                   |               |                   |                          |                   |                   |               |                   |
|                                                   | GLY+F.H.        | 0,227±0,012              | 4,069±0,220       | 3,771±0,269       | 15,9±1,70     | 23,25±1,43        | 0,331±0,027              | 5,450±0,336       | 3,704±0,165       | 22,0±0,85     | 33,34±3,14        |
|                                                   | F+25 %          |                          |                   |                   |               |                   |                          |                   |                   |               |                   |
|                                                   | GLY+F.H.        | N/A                      | 4,356±0,325       | 3,900±0,313       | 17,2±1,80     | 24,20±2,04        | 0,863±0,044              | 5,516±0,284       | 3,104±0,098       | 24,8±1,25     | 34,59±2,82        |
|                                                   | GLY+F.H. (F.H.) | 0,227±0,014              | 5,988±0,380       | 4,969±0,151       | 15,7±1,25     | 15,18±1,39        | N/A                      | 3,674±0,263       | 2,993±0,244       | 12,3±1,45     | 10,10±1,16        |

5

Table S5. Results of cultivation of two different species of the *Sporidiobolus* genus: *Sporidiobolus metaroseus* (3A) and *Sporidiobolus pararoseus* (3B)

6

|                                     | medium          | C/N25                    |                   |                   |               |                   | C/N 50                   |                   |                   |               |                   |
|-------------------------------------|-----------------|--------------------------|-------------------|-------------------|---------------|-------------------|--------------------------|-------------------|-------------------|---------------|-------------------|
|                                     |                 | Total carotenoids [mg/g] | Ubiquinone [mg/g] | Ergosterol [mg/g] | biomass [g/l] | lipid content [%] | Total carotenoids [mg/g] | Ubiquinone [mg/g] | Ergosterol [mg/g] | biomass [g/l] | lipid content [%] |
| 3A: <i>Sporidiobolus metaroseus</i> | GLY             | 0,490±0,037              | 1,834±0,118       | 4,295±0,306       | 2,2±1,05      | 8,35±1,04         | 0,629±0,026              | 2,290±0,184       | 1,905±0,157       | 3,4±1,10      | 8,47±0,80         |
|                                     | FAT             | 0,329±0,022              | 4,222±0,175       | 2,985±0,243       | 5,8±0,90      | 35,02±3,38        | 0,363±0,014              | 4,945±0,305       | 2,356±0,145       | 4,5±1,05      | 24,06±1,67        |
|                                     | F+10 % GLY      | 0,428±0,019              | 3,269±0,193       | 3,065±0,189       | 7,7±1,10      | 19,99±1,40        | 0,455±0,029              | 4,855±0,178       | 0,326±0,014       | 8,3±0,85      | 23,85±3,10        |
|                                     | F+25 % GLY      | 0,294±0,019              | 5,408±0,326       | 2,701±0,112       | 6,8±1,05      | 30,34±2,90        | 0,512±0,036              | 3,921±0,163       | 1,455±0,074       | 5,0±1,30      | 20,16±2,31        |
|                                     | GLY+F.H.        | 0,853±0,072              | 4,507±0,317       | 3,757±0,228       | 1,4±0,75      | 12,22±1,52        | 0,587±0,014              | 3,103±0,191       | 0,509±0,035       | 4,0±1,65      | 10,98±1,09        |
|                                     | GLY (F.H.)      | 1,247±0,044              | 5,490±0,219       | 3,084±0,124       | 7,2±1,15      | 11,99±0,88        | 0,931±0,046              | 6,130±0,241       | 2,810±0,207       | 4,2±1,50      | 13,28±0,92        |
|                                     | FAT+F.H.        | 0,927±0,043              | 4,579±0,226       | 2,216±0,114       | 11,2±0,85     | 23,70±2,00        | 0,847±0,052              | 7,023±0,502       | 1,923±0,095       | 7,0±0,67      | 44,23±3,30        |
|                                     | F+10 % GLY+F.H. | 0,823±0,057              | 4,254±0,262       | 1,880±0,141       | 14,3±1,85     | 33,67±2,30        | 0,672±0,053              | 7,088±0,618       | 2,003±0,080       | 11,0±1,70     | 38,60±4,04        |
|                                     | F+25 % GLY+F.H. | 0,883±0,071              | 5,610±0,304       | 2,454±0,219       | 15,2±1,95     | 36,41±3,43        | 0,896±0,072              | 7,482±0,475       | 2,373±0,071       | 15,7±1,05     | 31,91±2,76        |
|                                     | GLY+F.H. (F.H.) | 1,675±0,108              | 3,208±0,229       | 3,346±0,136       | 13,5±0,65     | 23,56±1,29        | 1,255±0,064              | 7,845±0,327       | 3,755±0,151       | 7,2±0,65      | 14,87±1,34        |
| 3B: <i>Sporidiobolus pararoseus</i> | GLY             | 2,690±0,175              | 5,291±0,434       | 9,247±0,833       | 2,4±0,55      | 6,42±0,49         | 0,088±0,006              | 4,188±0,177       | 7,181±0,248       | 2,3±1,05      | 7,09±0,81         |
|                                     | FAT             | 1,360±0,124              | 10,300±0,368      | 5,913±0,482       | 13,4±1,45     | 19,76±2,44        | 0,713±0,064              | 5,226±0,330       | 3,365±0,213       | 21,8±1,15     | 35,13±4,74        |
|                                     | F+10 % GLY      | 1,845±0,095              | 10,485±0,644      | 5,806±0,358       | 12,5±1,20     | 15,41±2,52        | 0,393±0,014              | 6,343±0,510       | 4,096±0,283       | 20,8±0,90     | 34,48±2,96        |
|                                     | F+25 % GLY      | 1,558±0,065              | 9,273±0,373       | 5,178±0,181       | 15,9±0,55     | 20,59±1,31        | 0,640±0,030              | 6,659±0,497       | 3,273±0,131       | 18,7±1,30     | 28,78±2,72        |
|                                     | GLY+F.H.        | 0,987±0,066              | 4,429±0,362       | 4,072±0,290       | 11,3±1,25     | 10,26±1,28        | N/A                      | 5,570±0,360       | 2,463±0,139       | 11,8±0,90     | 19,71±1,25        |
|                                     | GLY (F.H.)      | 0,723±0,070              | 6,605±0,475       | 8,231±0,509       | 1,8±0,75      | 5,17±0,44         | 1,460±0,058              | 9,460±0,432       | 14,365±1,015      | 1,6±0,55      | 3,68±0,46         |
|                                     | FAT+F.H.        | 0,773±0,058              | 14,712±0,639      | 5,464±0,273       | 16,1±1,40     | 32,3±4,01         | 0,430±0,011              | 8,801±0,450       | 2,779±0,232       | 24,5±1,10     | 34,13±2,62        |
|                                     | F+10 % GLY+F.H. | 0,715±0,023              | 15,251±0,532      | 5,307±0,327       | 14,3±0,80     | 24,92±2,82        | 2,425±0,174              | 8,962±0,683       | 2,580±0,101       | 30,1±1,50     | 34,30±5,30        |
|                                     | F+25 % GLY+F.H. | 0,384±0,012              | 5,216±0,419       | 2,598±0,169       | 15,4±1,30     | 22,38±2,89        | 0,486±0,021              | 9,008±0,360       | 3,250±0,166       | 28,2±0,95     | 26,84±2,57        |
|                                     | GLY+F.H. (F.H.) | 0,238±0,011              | 8,382±0,645       | 5,980±0,267       | 9,9±1,55      | 10,58±1,48        | 0,398±0,025              | 6,709±0,487       | 3,590±0,117       | 16,6±0,80     | 22,38±1,94        |

7
